# Supplementary material for: Bacterial genome editing by coupling Cre-lox and CRISPR-Cas9 systems
Source: PubMed Central journal article supplement (PMC7641437; doi:10.1371/journal.pone.0241867), 2020-11-04

Figure 2B\_raw

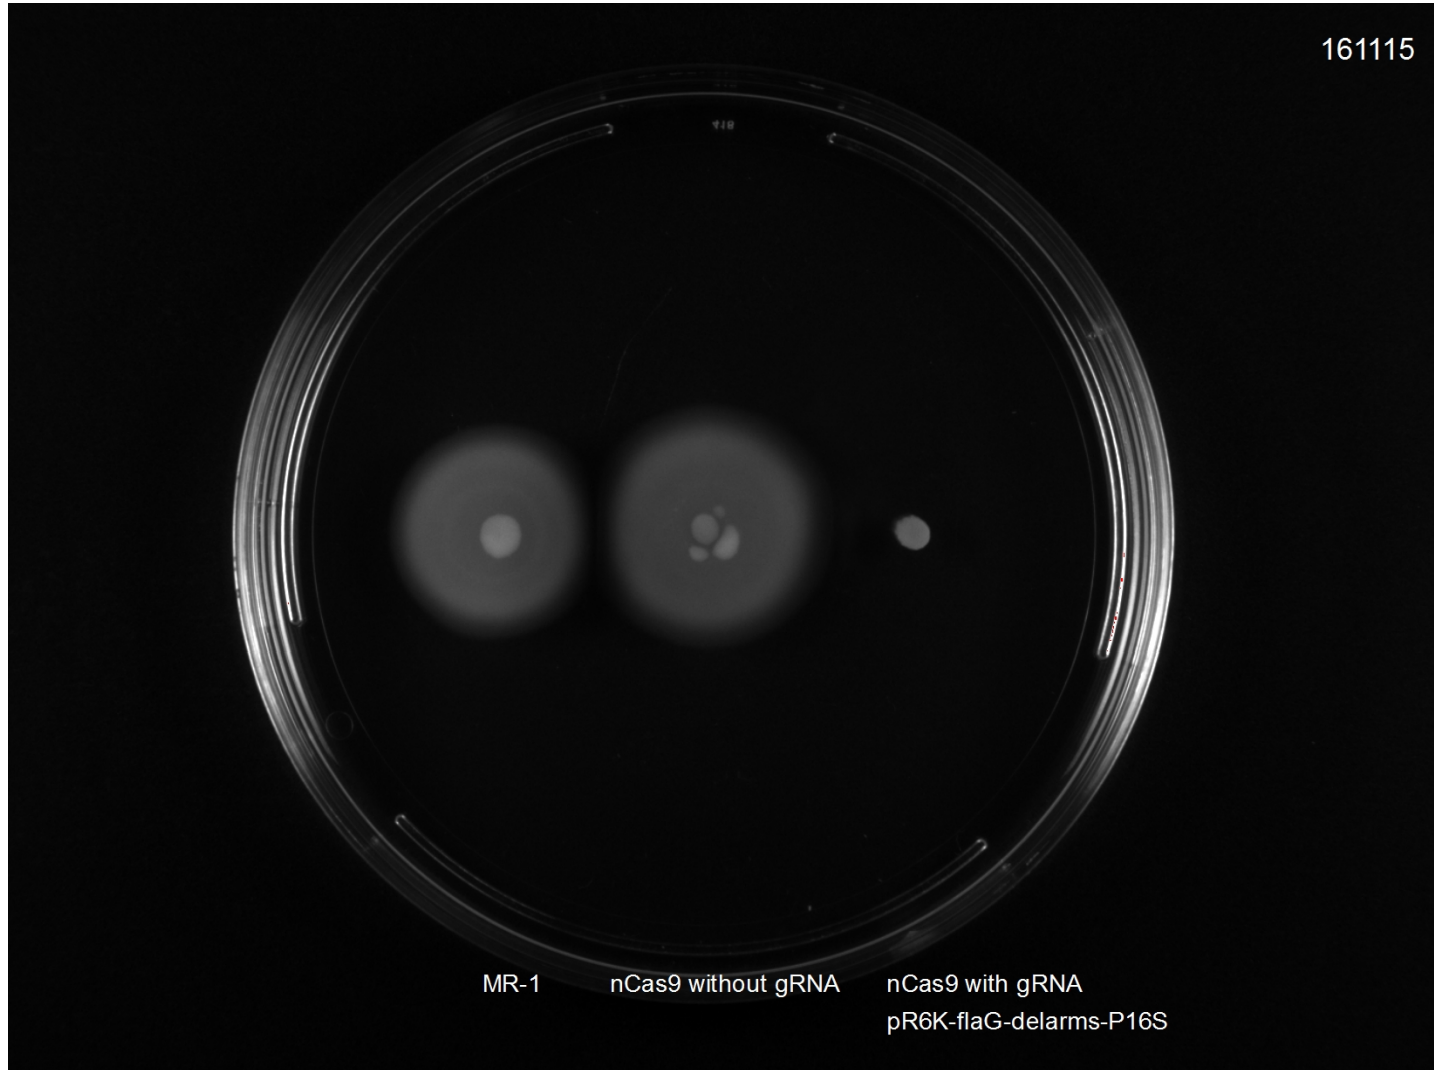

Figure 2C\_raw

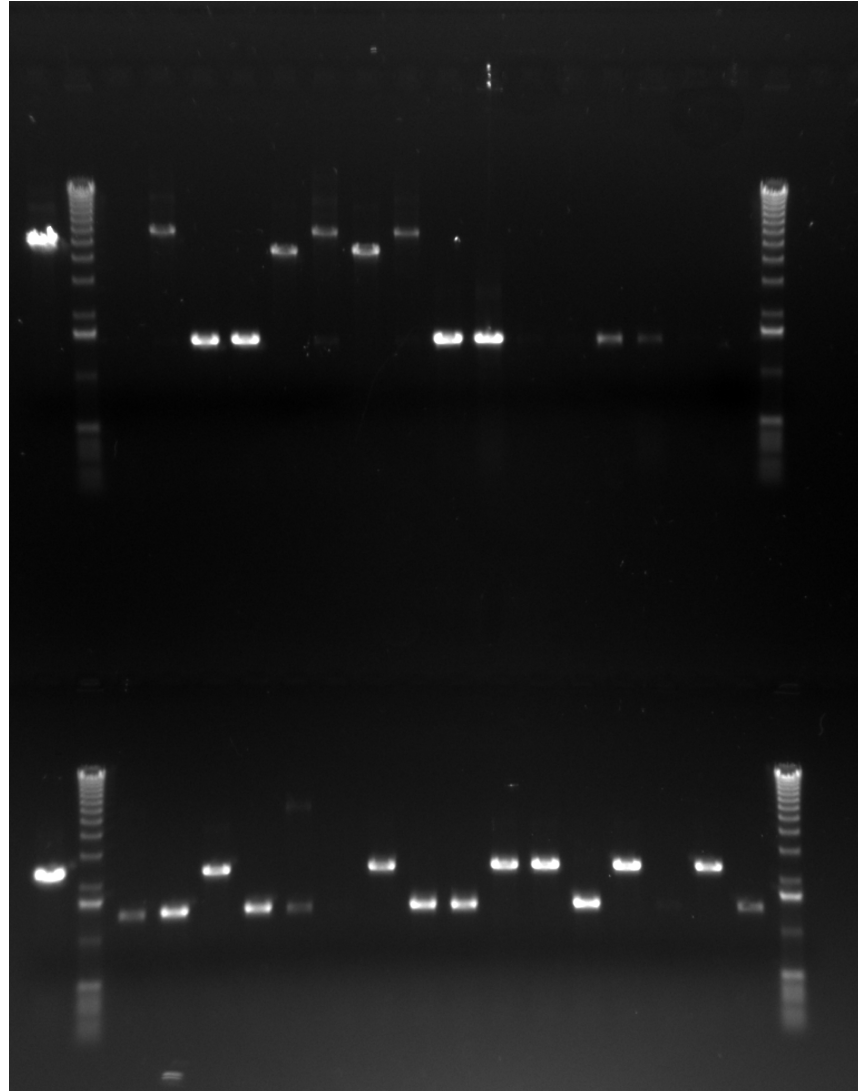

Figure 4C\_raw

2019-12-17 photorhabdus LP cure screen and streak for paper

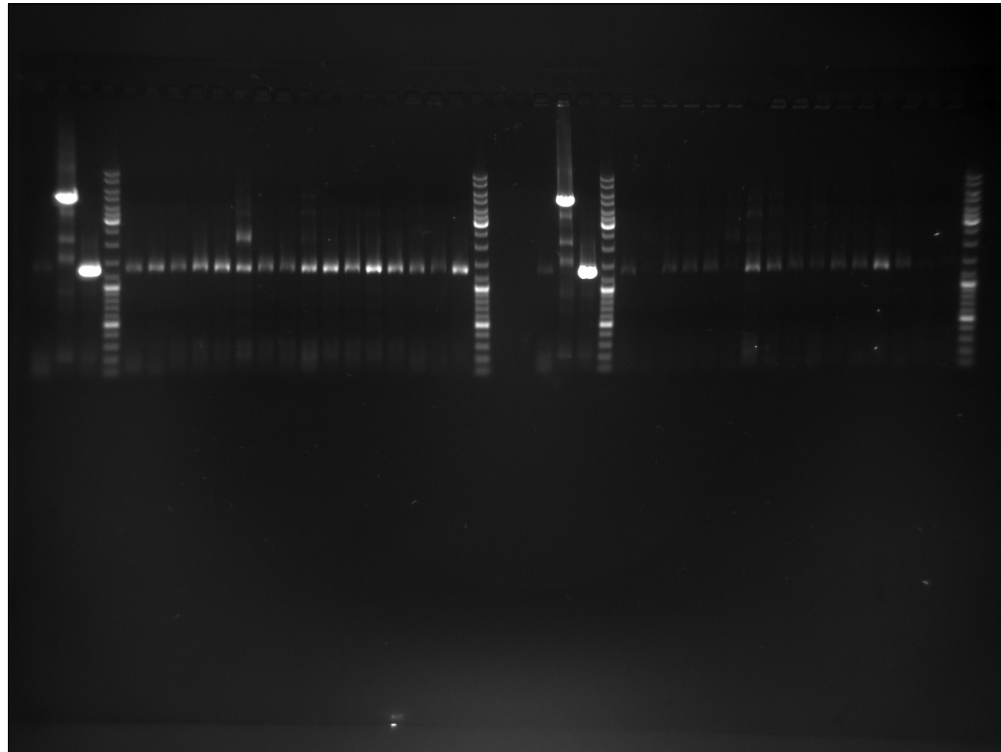

Figure S3B\_raw

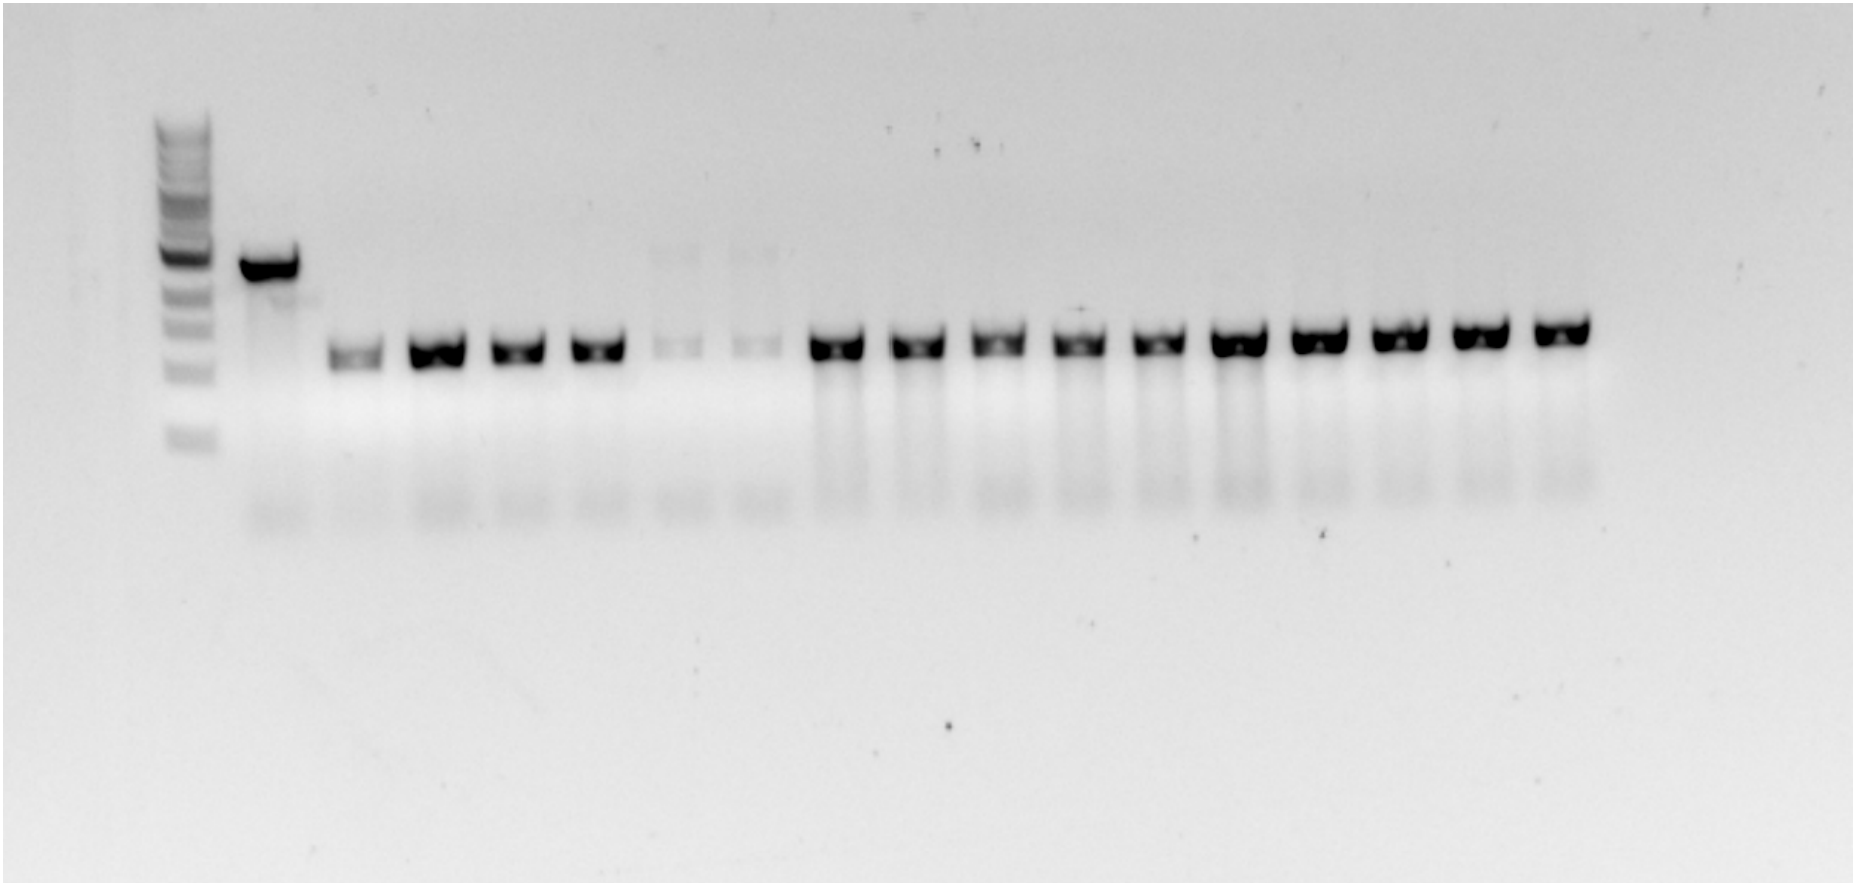

Figure S4B\_C\_raw

2019-12-16 Pseudomonas pvdl del screen and streak screen

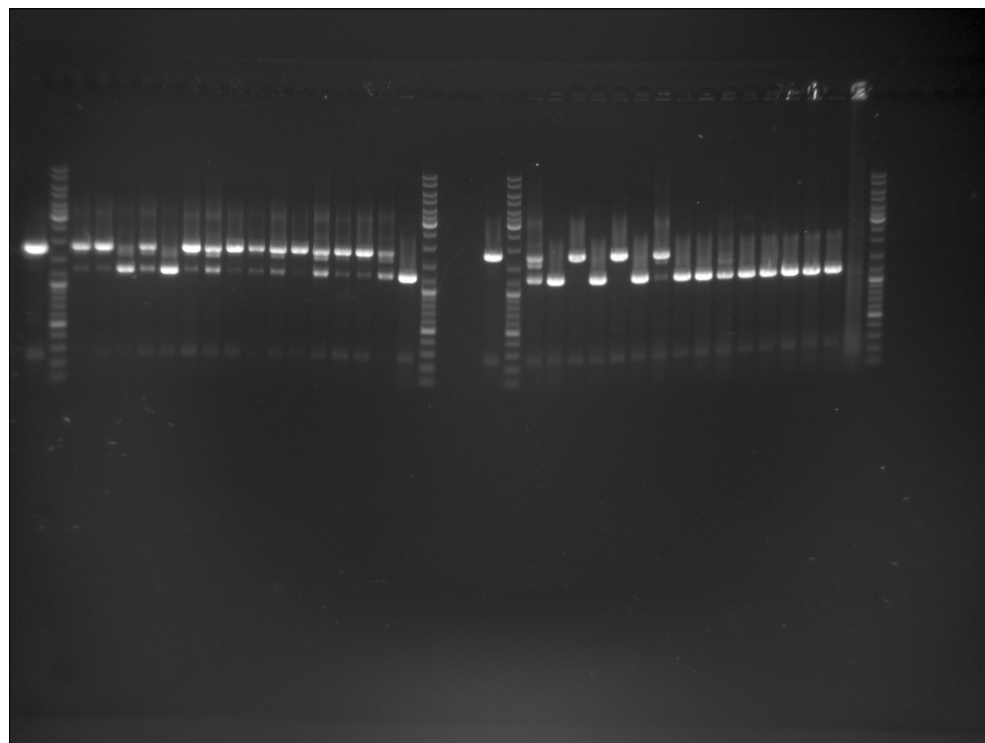

Location: //octopus/GenTech/Synthetic Biology/Dave/gel images BioRad  
Printed: 12/16/2019 3:51:00 PM

Figure S5\_NRPS\_1\_raw

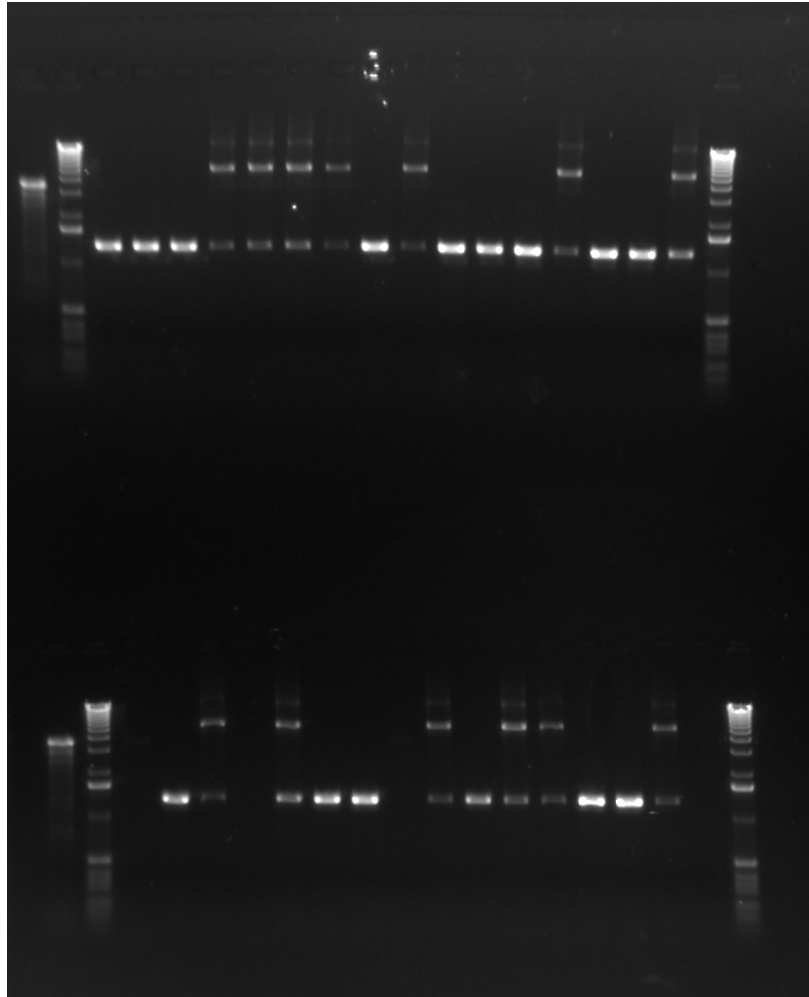

Figure S5\_NRPS\_2\_raw

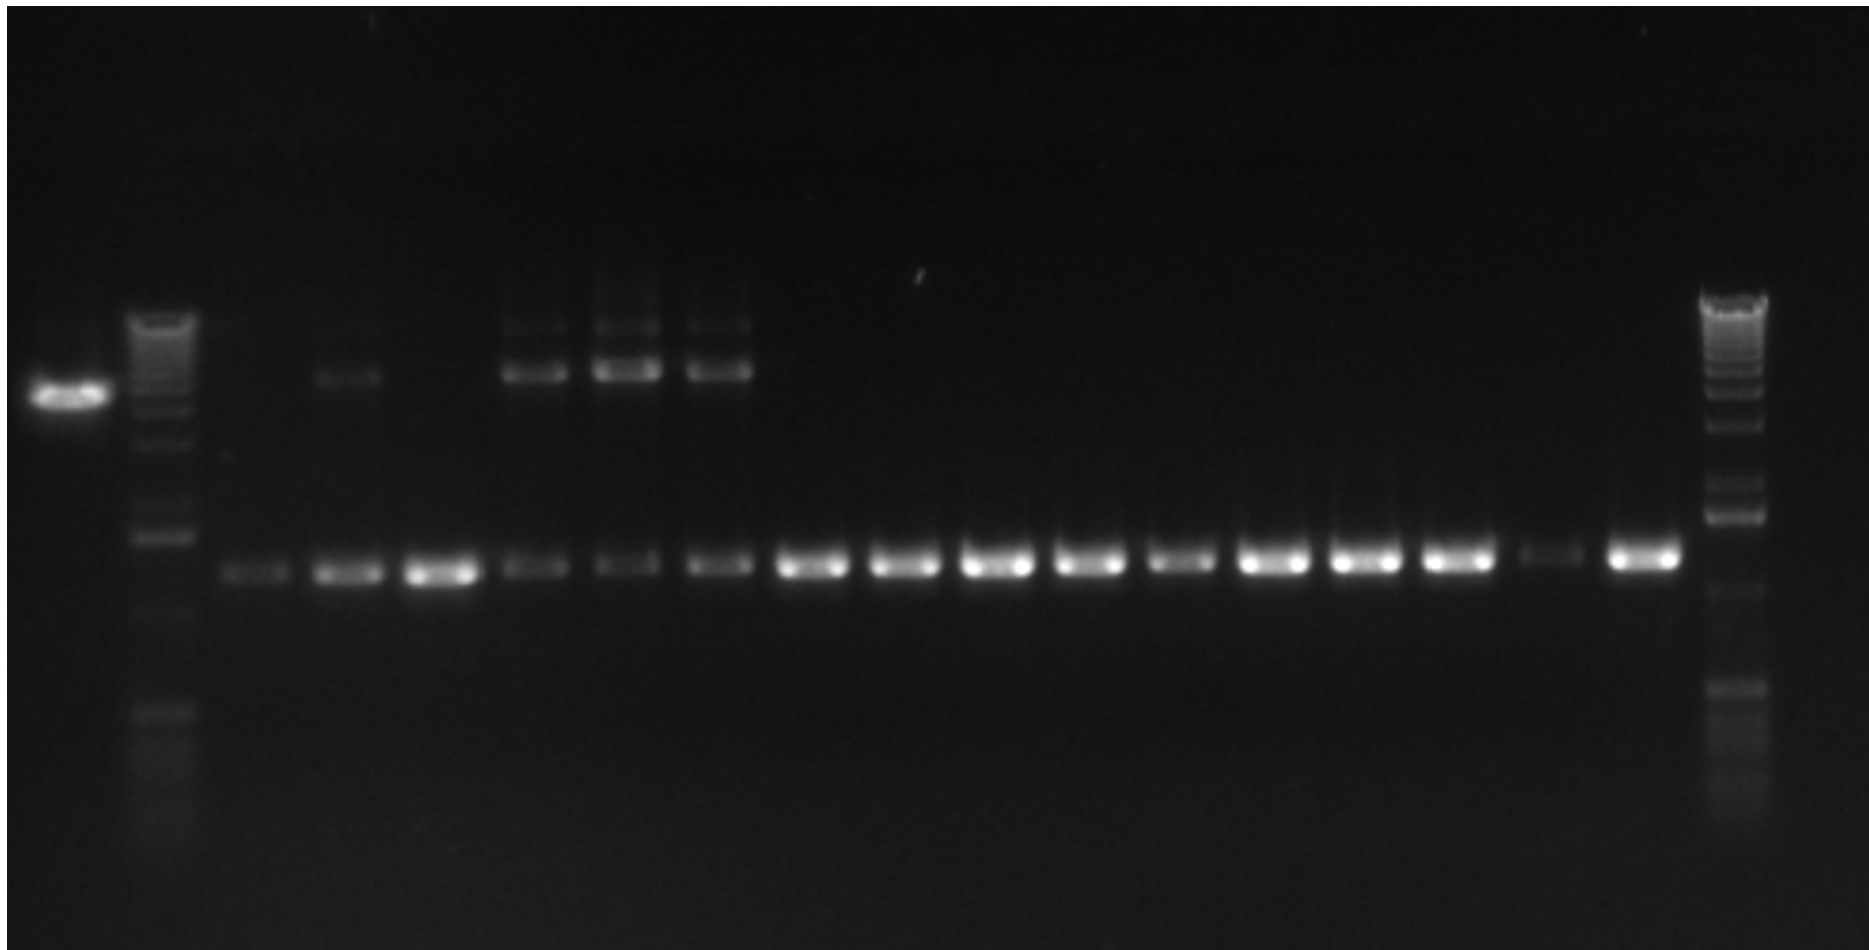

Figure S5\_NRPS\_3\_raw\_left

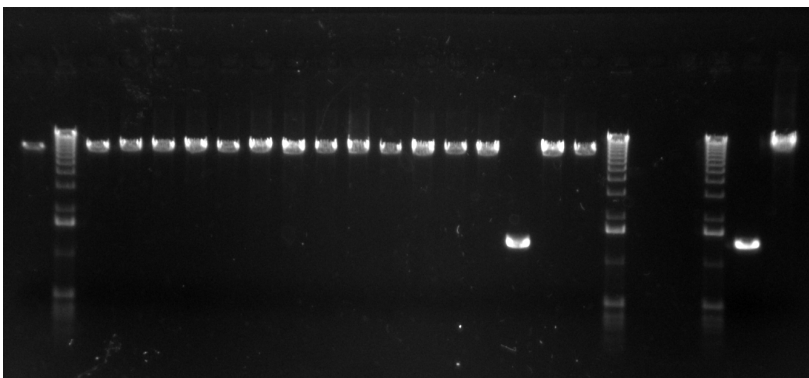

Figure S5\_NRPS\_3\_raw\_middle

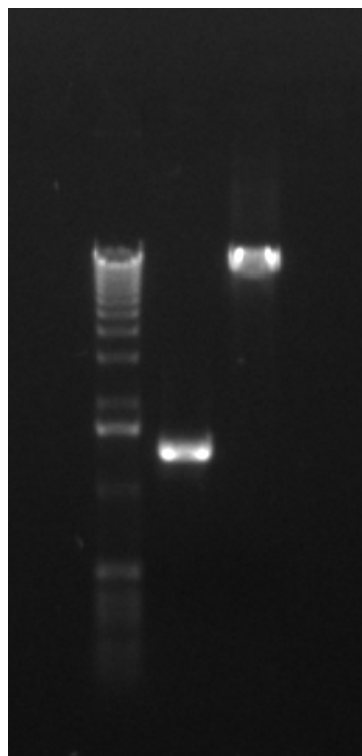

Figure S5\_NRPS\_3\_raw\_right

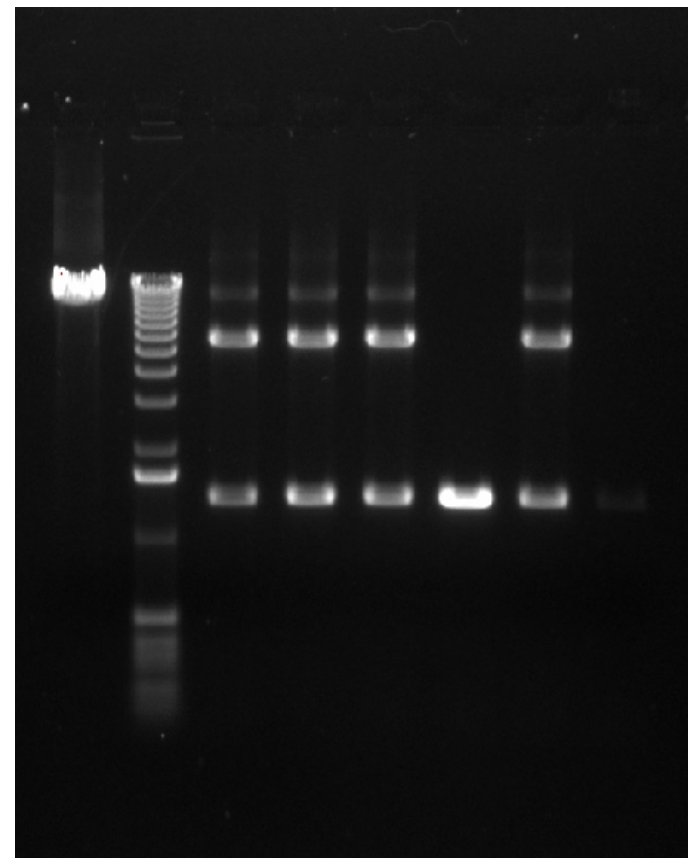



Figure S5\_NRPS\_4\_raw

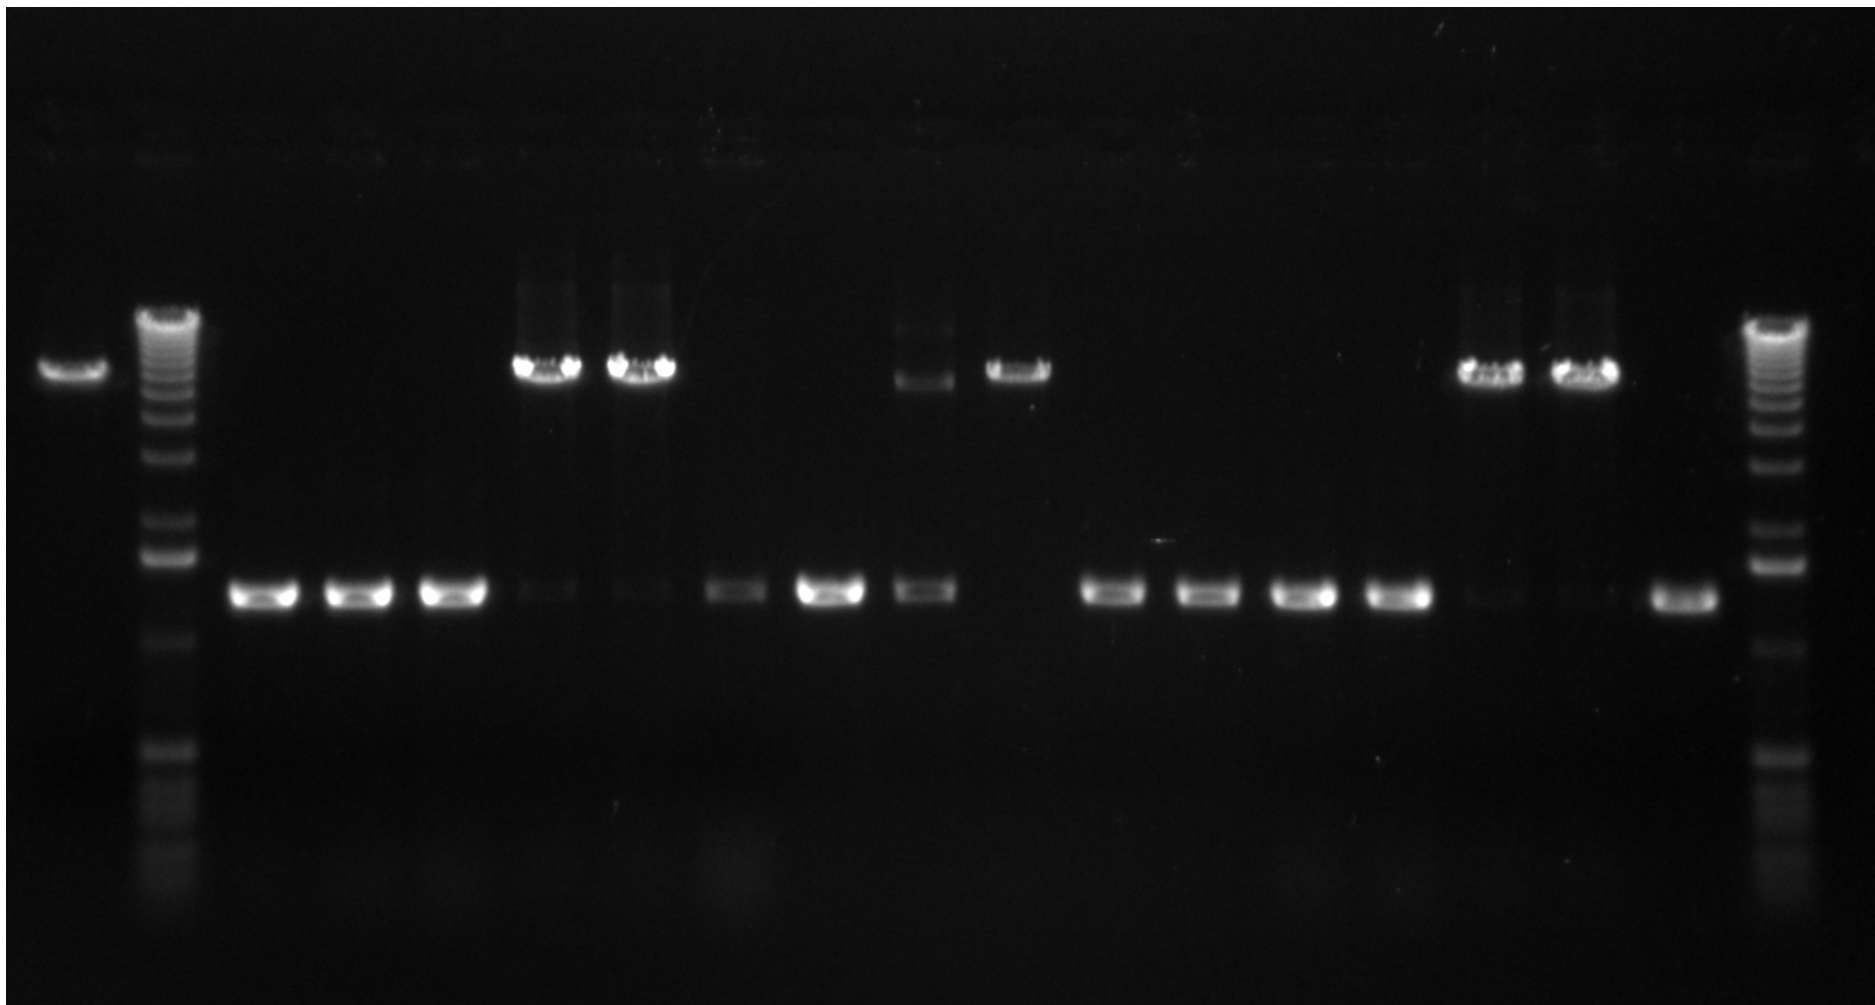

Figure S5\_NRPS\_5\_raw

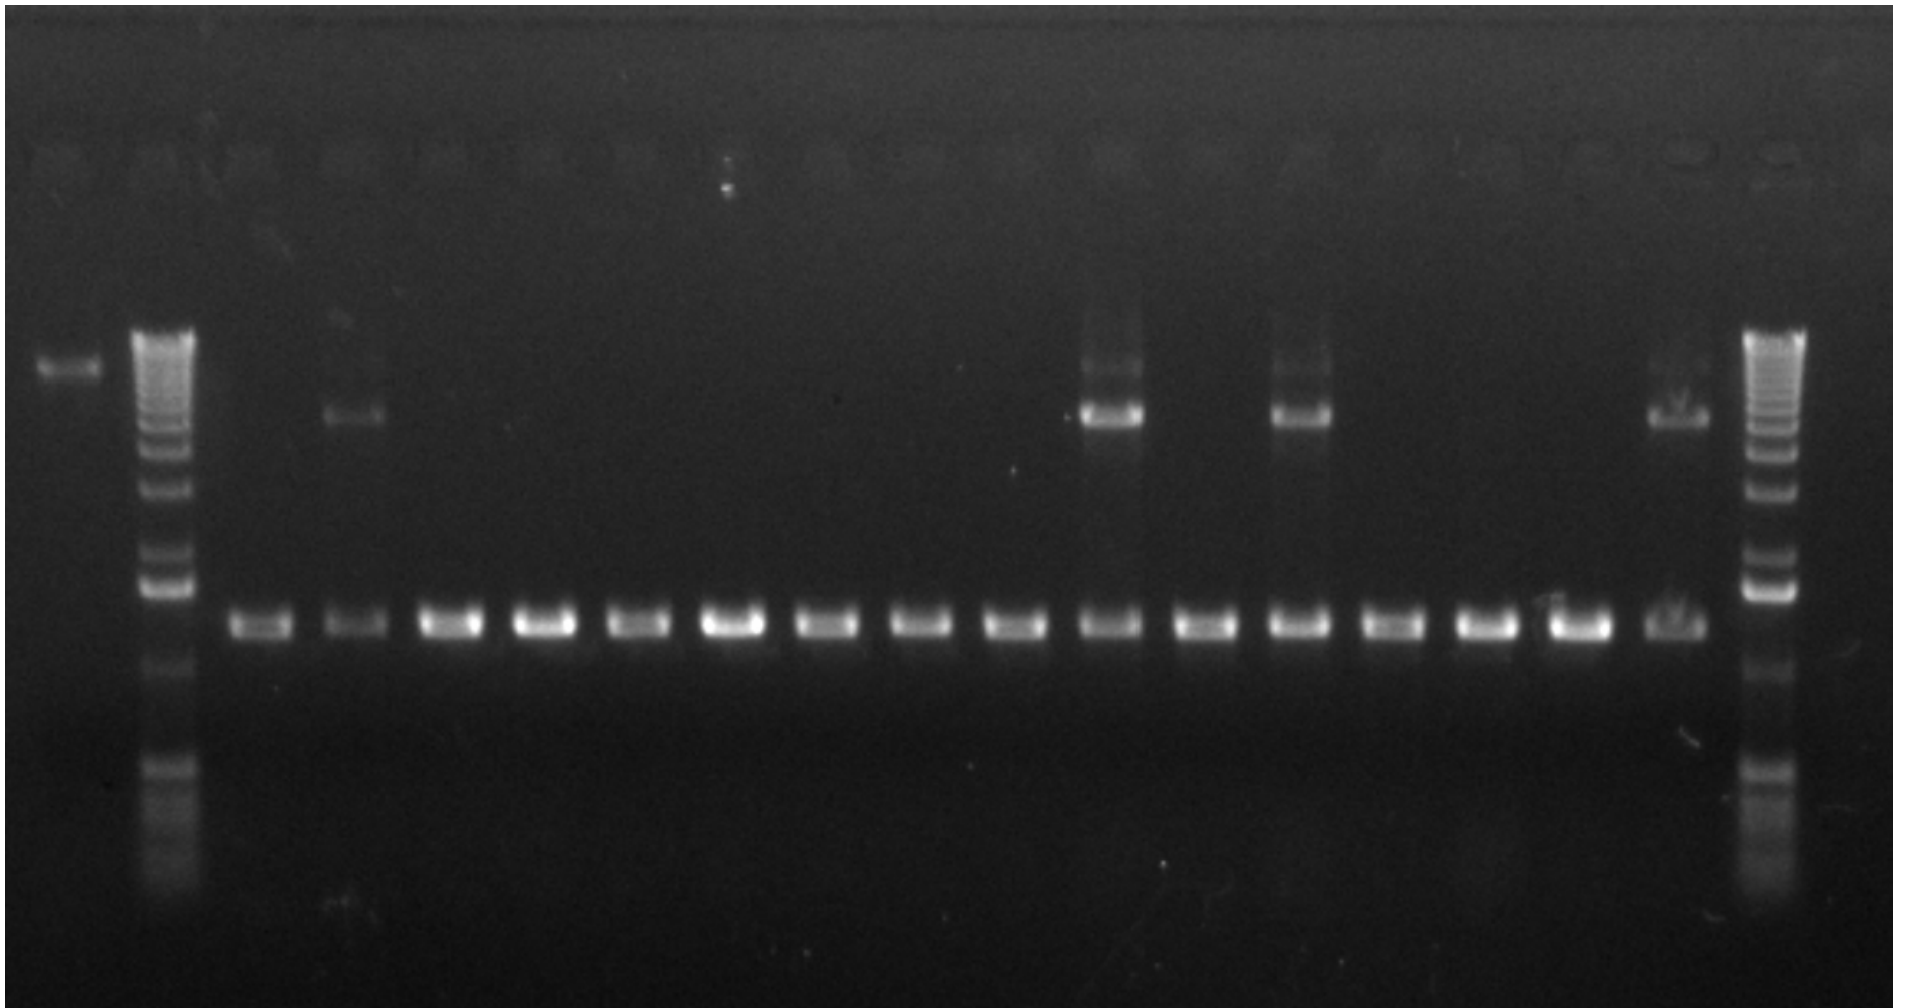

Figure S5\_NRPS\_6\_raw

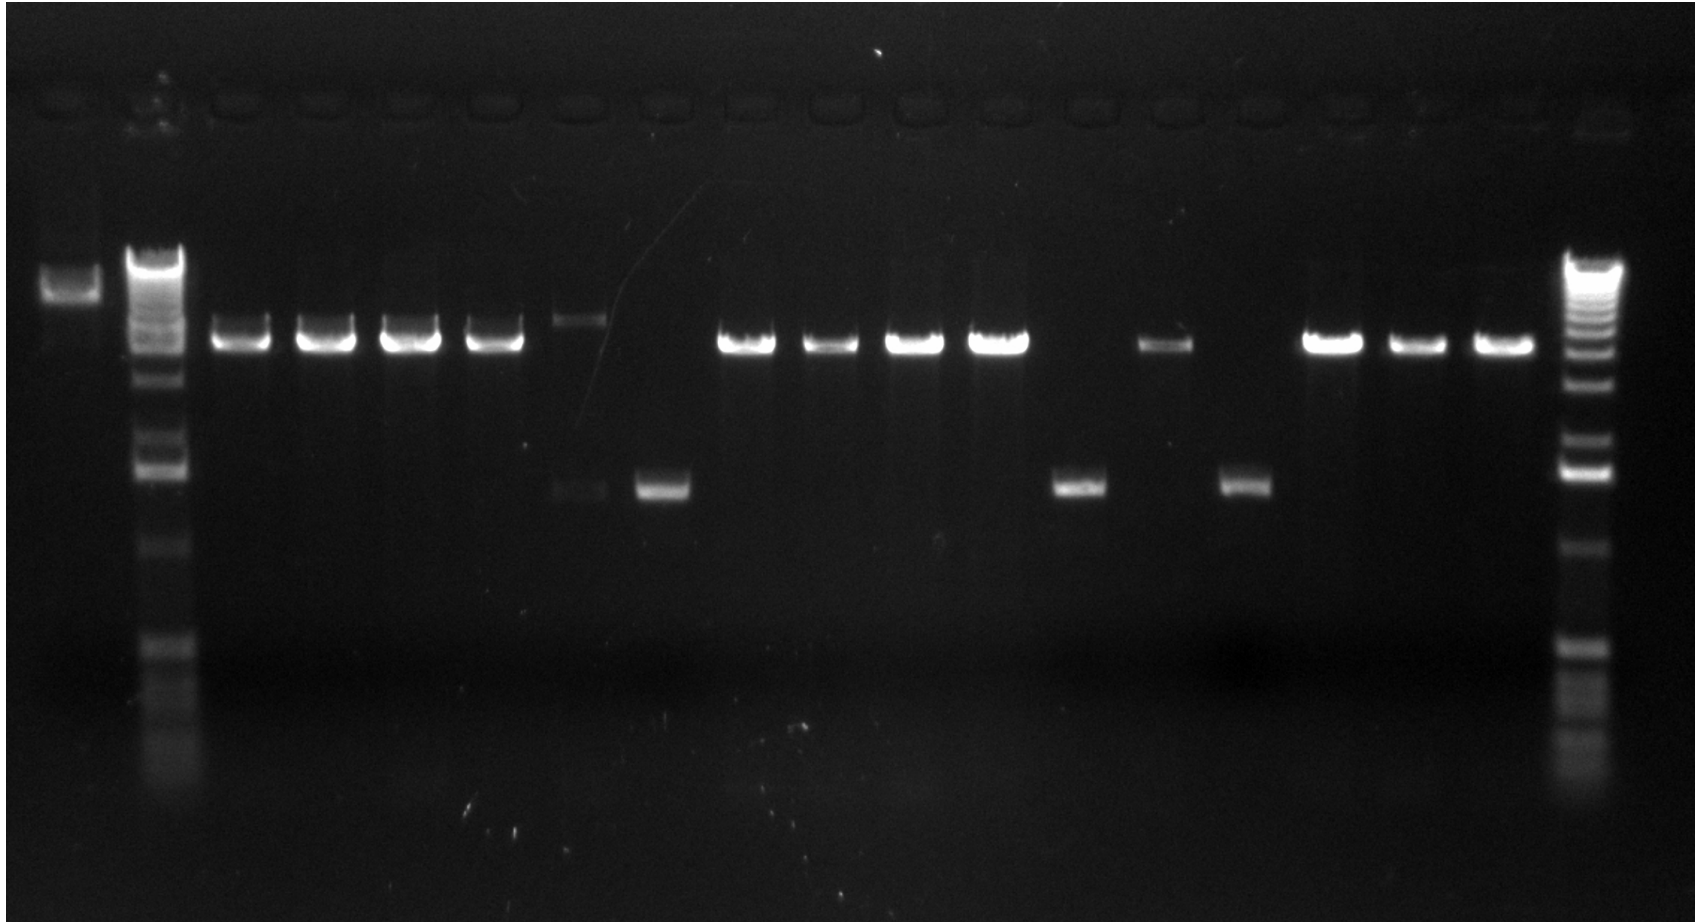

Figure S5\_NRPS\_7\_raw

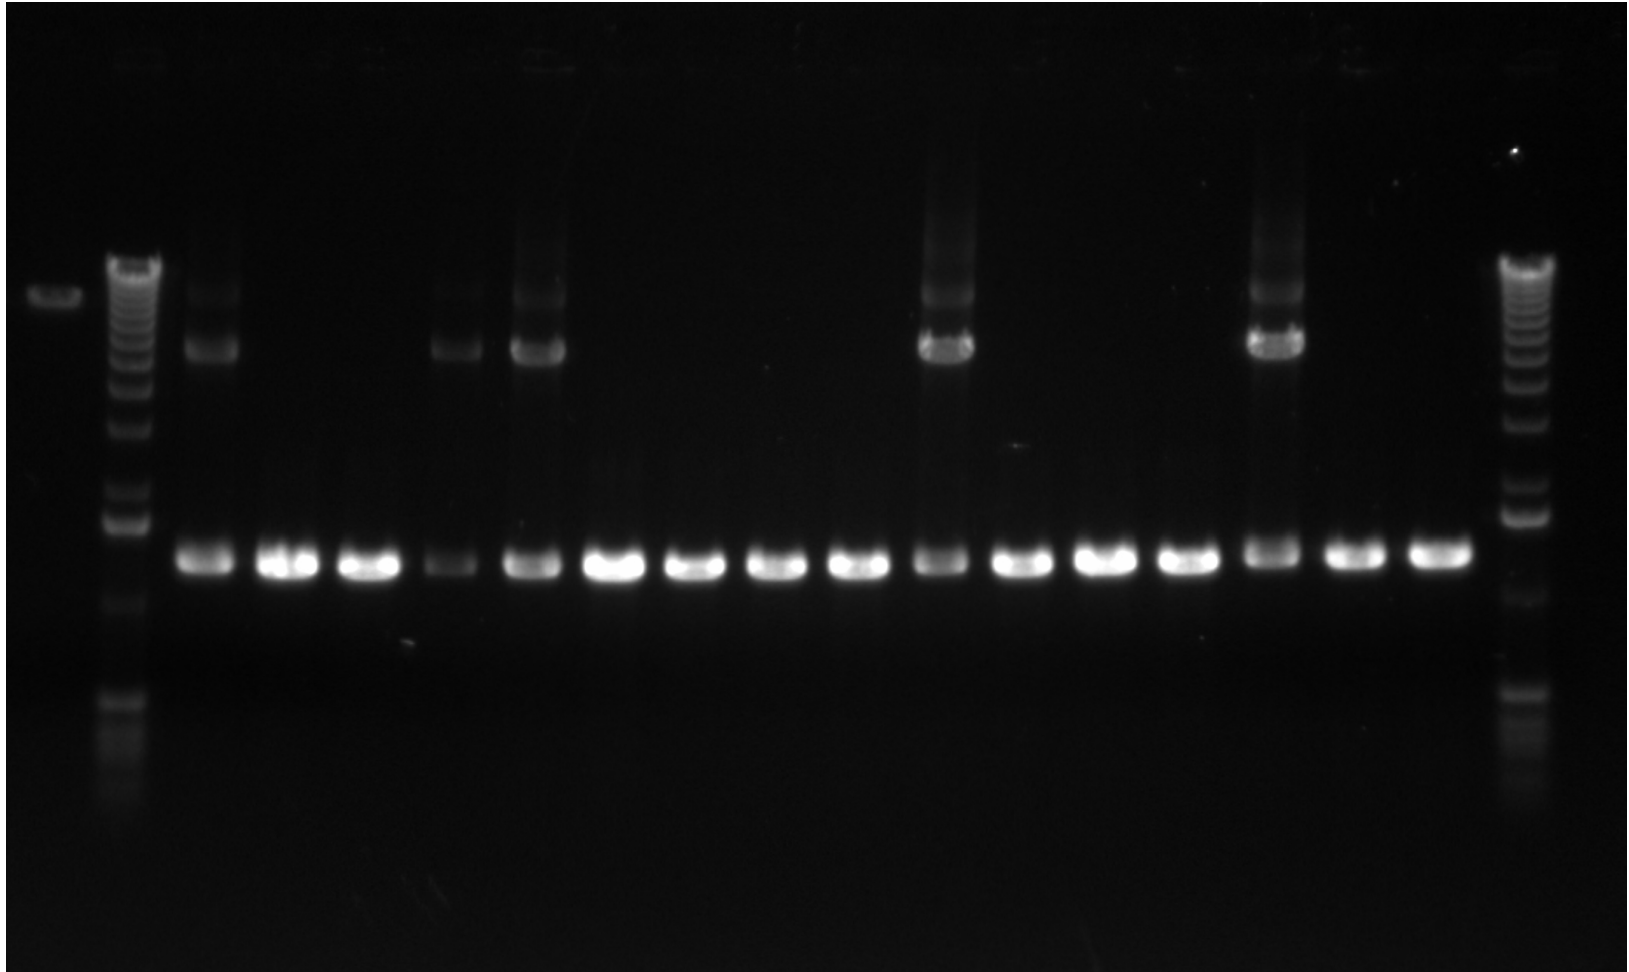

Figure S5\_NRPS\_9\_raw

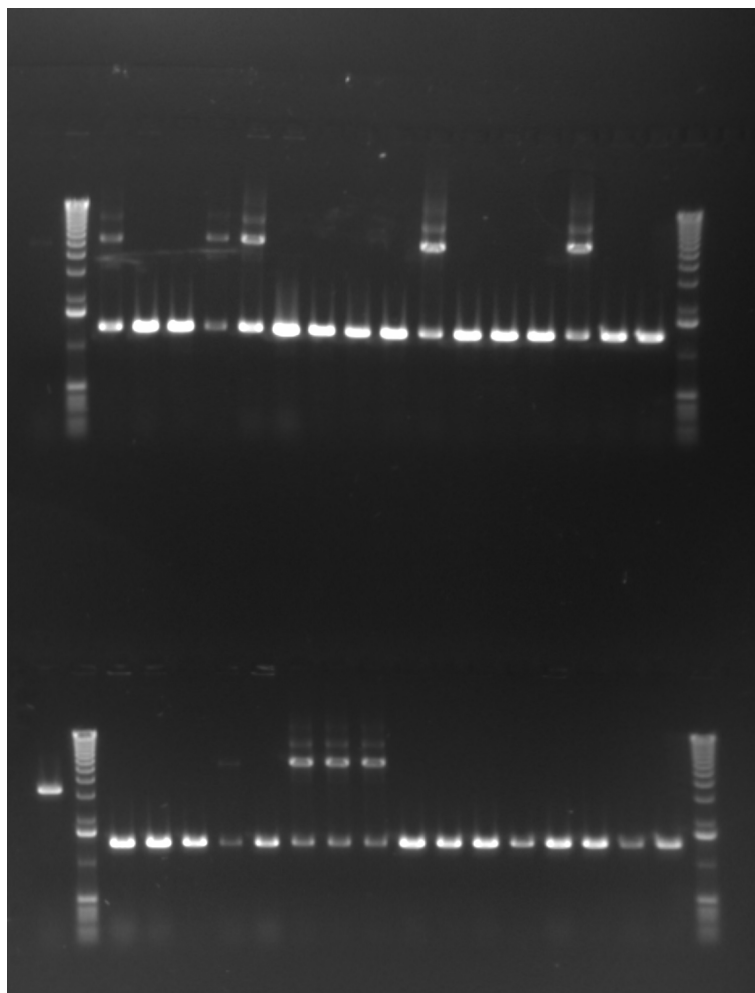

Figure S5\_NRPS\_10\_raw

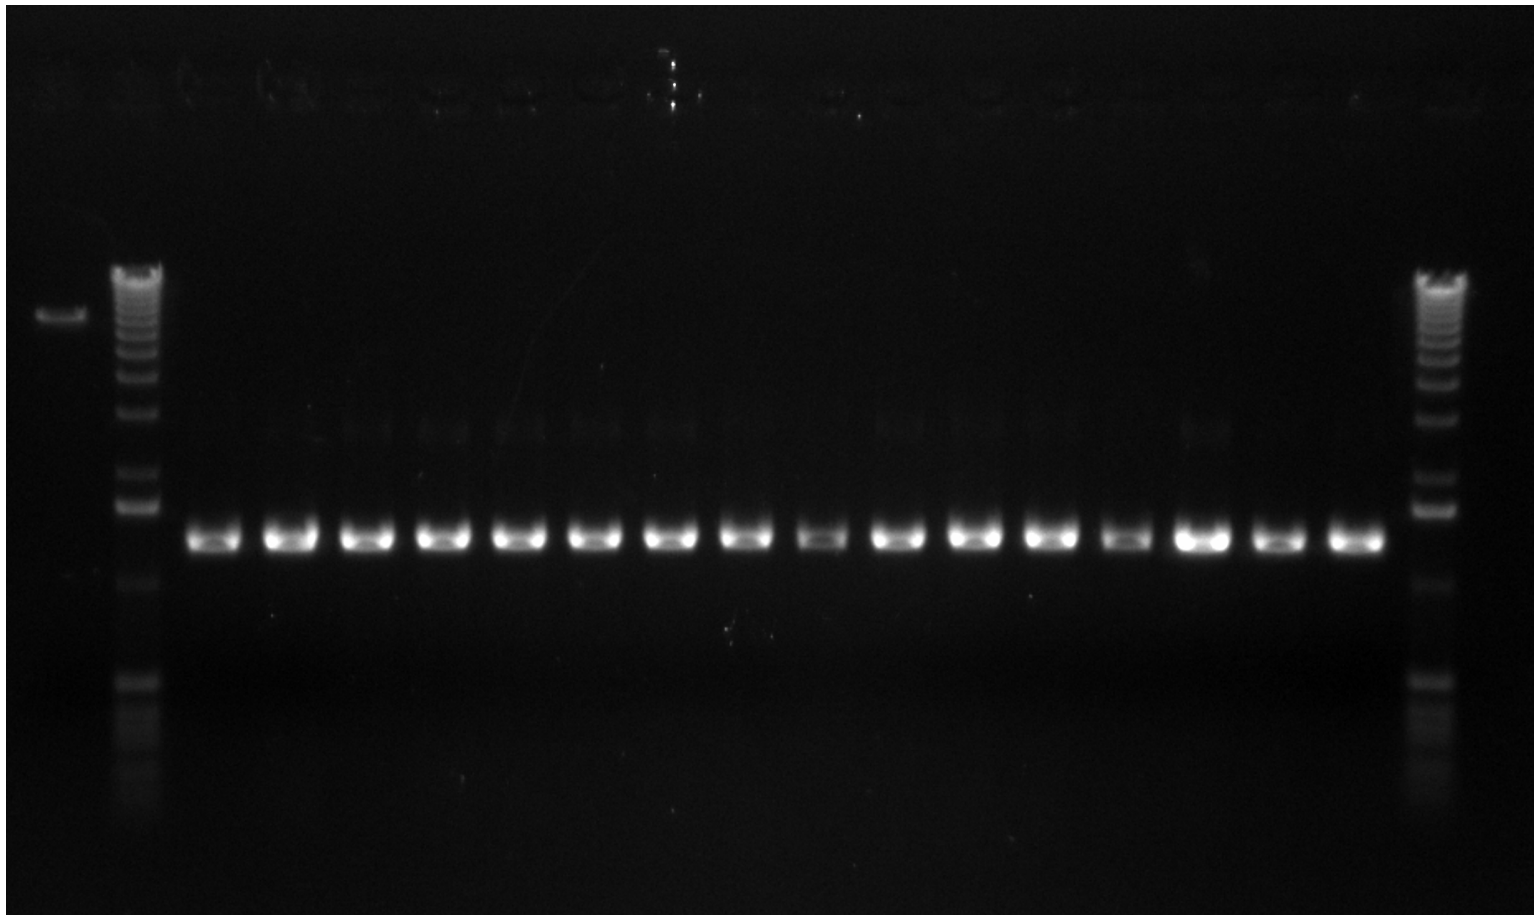

Figure S5\_NRPS\_11\_raw

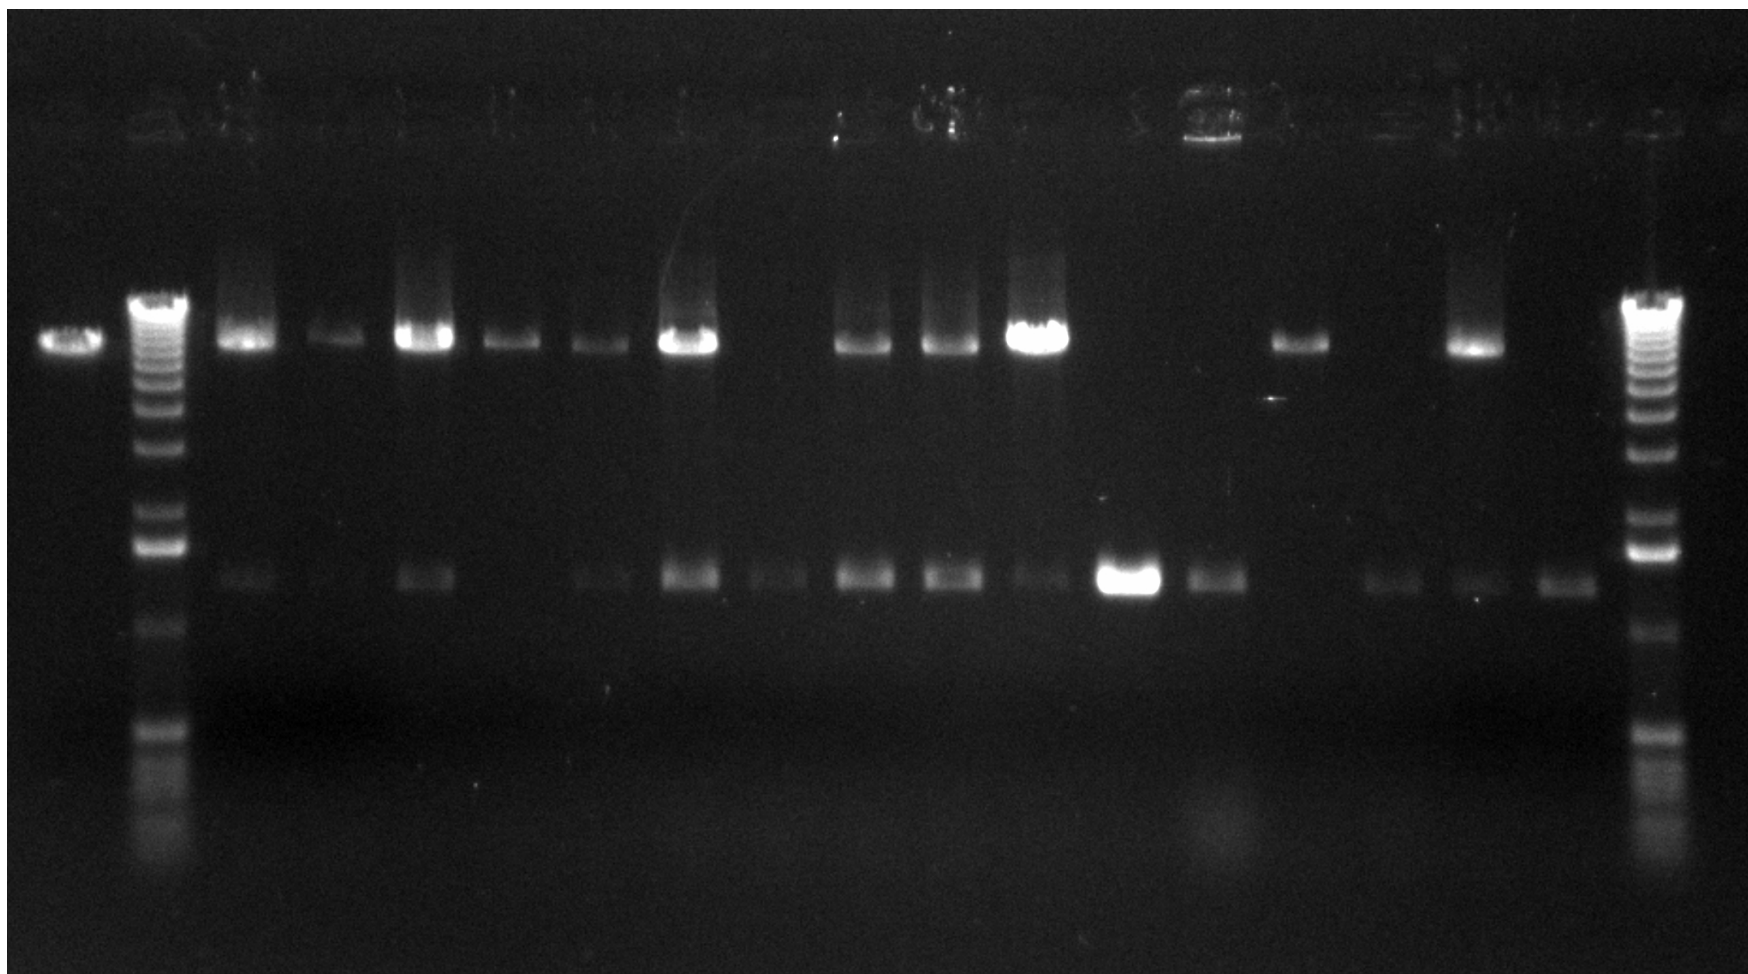

Supplement: pone.0241867.s015.pdf [file pone.0241867.s015.pdf]
